# Supplementary material for: Occurrence and attenuation of pharmaceuticals and their transformation products in rivers impacted by sewage treatment plants
Source: Royal Society of Chemistry journal article supplement (doi:10.1039/c7ra06852b), 2017-01-01
Supplement: c7ra06852b1.pdf [file c7ra06852b1.pdf]

## Supporting Information for

### Occurrence and Attenuation of Pharmaceuticals and Their Transformation Products in Rivers Impacted by Sewage Treatment Plant

Daoping Zha<sup>1</sup>, Ying Li<sup>1\*</sup>, Li Wang<sup>2</sup>, Cunman Yang<sup>1</sup>, Guanghua Lu<sup>1</sup>

1. Key Laboratory of Integrated Regulation and Resource Development on Shallow Lakes, Ministry of Education; College of Environment, HoHai University, Nanjing, Jiangsu Province 210098, China

2. Jiangsu Province Hydrology and Water Resources Investigation Bureau, Nanjing, Jiangsu Province 210029, China

#### Chemicals and material

The purity of all pharmaceuticals and their TPs was higher than 98%. The standard substances antipyrine (ATP), naproxen (NPX), carbamazepin 10,11-epoxide (CBZE), 1-naphthol (1-NT) were obtained from Sigma-Aldrich Trading Co., Ltd (Shanghai, China). 2-Hydroxy ibuprofen (2-OHIPF), carboxy ibuprofen (CIPF), 4-hydroxydiclofenac acid (4-OHDCF) were provided from Toronto Research Chemicals Inc (Toronto, Canada). Acetaminophen (ACE) was purchased from CND Isotopes (Pointe-Claire, Canada). Bezafibrate (BZB), 4-chlorobenzoic acid (4-CBA), ibuprofen (IPF), clofibric acid (CA), diclofenac acid (DCF), sulfadiazine (SDZ), sulfacetamide (STM), sulfamethoxazole (SMZ), N<sup>4</sup>-acetyl Sulfamethoxazole (NAST), sulfathiazole (ST), carbamazepin (CBZ), phenacetin (PHE), nifedipine (NP) were purchased from J&K Chemical (Beijing, China). All surrogate standards except IPF-d<sub>3</sub> were purchased from CND Isotopes (Pointe-Claire, Canada) and IPF-d<sub>3</sub> was obtained from Toronto Research Chemicals Inc (Toronto, Canada). HPLC-grade methanol and acetonitrile were purchased from Merck Corporation (Darmstadt, Germany). Ultrapure water was produced by a water purification system (Sichuan Ulupure Ultrapure Technology Company, China). The concentration of 1.0 g L<sup>-1</sup> monomolecular stock solutions in methanol were spared and 10 mg L<sup>-1</sup> working solutions of all

substances were also stored in methanol. All standard analyte solutions were stored at -20°C.

### **River characteristic**

Physicochemical parameters of rivers such as dissolved oxygen, electrical conductivity, temperature and pH were monitored three times a week that using hand-held probes (Hach, USA) in the sampling process. Water flow velocity was measured by a model of LS1206B flow meter (Senlod, China) during the sampling course. And total suspended solids were collected from 0.45 µm glass fiber filter that water samples through.

### **Analytical methods**

A 98:2 (v/v) water/methanol solution (phase A) and methanol solution (phase B), both containing 0.05% formic acid, were used as mobile phases for positive-ion mode. Mobile phases of 98:2 (v/v) water/methanol solution with 5 mM ammonium acetate (phase A) and acetonitrile (phase B) were used for negative ion mode. Detection of the target compounds was carried out on a mass spectrometer with ESI. ESI was used as ion source at a temperature of 150°C, and detection and quantification of analytes was done in multiple-reaction-monitoring mode. Sulfadiazine (SDZ), sulfacetamide (STM), sulfathiazole (ST), sulfamethoxazole (SMZ), N<sub>4</sub>-acetylsulfamethoxazole (NAST), carbamazepine (CBZ), carbamazepine-10,11-epoxide (CBZE), phenacetin (PHE), acetaminophen (ACE), and antipyrine (ATP) were detected in positive-ion mode. Bezafibrate (BZB), 4-chlorobenzoic acid (4-CBA), ibuprofen (IPF), 2-hydroxyibuprofen (2-OHIPF), carboxyibuprofen (CIPF), clofibric acid (CA), diclofenac acid (DCF), 4-hydroxydiclofenac acid (4-OHDCF), naproxen (NPX), 1-naphthol (1-NT), and nifedipine (NP) were detected in negative-ion mode.

**Table S1.** The composition of mobile phase in two ion modes.

| Time (min)        | Composition of mobile phase (%) |    |
|-------------------|---------------------------------|----|
|                   | A                               | B  |
| Positive ion mode | A                               | B  |
| 0                 | 90                              | 10 |
| 2.5               | 90                              | 10 |
| 4                 | 10                              | 90 |
| 5                 | 10                              | 90 |
| 5.01              | 90                              | 10 |
| 6                 | 90                              | 10 |
| Negative ion mode | A                               | B  |
| 0                 | 90                              | 10 |
| 2.5               | 90                              | 10 |
| 4                 | 10                              | 90 |
| 5                 | 10                              | 90 |
| 5.01              | 90                              | 10 |
| 6                 | 90                              | 10 |

**Table S2.** The mass spectrometer optimization parameters of target compounds (including ionization mode, precursor ion, product ion, cone voltage, collision energy).

| <b>Compound</b>      | precursor ion<br>(m/z) | product ion<br>(m/z) | cone<br>voltage (V) | collision<br>energy (eV) | ionization<br>mode |
|----------------------|------------------------|----------------------|---------------------|--------------------------|--------------------|
| ACE-d <sub>3</sub>   | 155.07                 | 92.92                | 26                  | 22                       | ESI+               |
| ACE <sup>↑</sup>     | 152                    | 110                  | 40                  | 12                       | ESI+               |
| PHE                  | 179.94                 | 151.85               | 84                  | 32                       | ESI+               |
| ATP-d <sub>3</sub>   | 192                    | 58.92                | 40                  | 28                       | ESI+               |
| ATP                  | 189                    | 55.92                | 40                  | 28                       | ESI+               |
| SMZ-d <sub>4</sub>   | 258.13                 | 96.03                | 28                  | 28                       | ESI+               |
| STM <sup>↑</sup>     | 215                    | 156                  | 17                  | 12                       | ESI+               |
| SDZ                  | 251                    | 92                   | 25                  | 27                       | ESI+               |
| SMZ                  | 254                    | 156                  | 25                  | 16                       | ESI+               |
| ST                   | 256                    | 92                   | 23                  | 25                       | ESI+               |
| NAST <sup>↑</sup>    | 296                    | 134                  | 24                  | 16                       | ESI+               |
| CBZ-d <sub>10</sub>  | 246.97                 | 175                  | 30                  | 42                       | ESI+               |
| CBZ                  | 236.97                 | 178.87               | 30                  | 34                       | ESI+               |
| CBZE <sup>↑</sup>    | 253.07                 | 236                  | 28                  | 12                       | ESI+               |
| IPF-d <sub>3</sub>   | 208.1                  | 164                  | 16                  | 7                        | ESI-               |
| IPF                  | 205.1                  | 161                  | 16                  | 7                        | ESI-               |
| 2-OHIPF <sup>↑</sup> | 221.1                  | 177                  | 16                  | 7                        | ESI-               |
| CIPF <sup>↑</sup>    | 235.1                  | 72.9                 | 20                  | 16                       | ESI-               |
| DCF-d <sub>4</sub>   | 298                    | 254                  | 22                  | 15                       | ESI-               |
| DCF                  | 294                    | 250                  | 22                  | 15                       | ESI-               |
| 4-OHDCF <sup>↑</sup> | 312                    | 230                  | 30                  | 32                       | ESI+               |
| CA-d <sub>4</sub>    | 217.2                  | 131.01               | 20                  | 18                       | ESI-               |
| CA                   | 213.13                 | 127.01               | 24                  | 16                       | ESI-               |
| BZB-d <sub>6</sub>   | 366.3                  | 274.12               | 30                  | 18                       | ESI-               |
| BZB                  | 360.13                 | 274.06               | 32                  | 20                       | ESI-               |
| 4-CBA <sup>↑</sup>   | 155.03                 | 111                  | 24                  | 10                       | ESI-               |
| NPX-d <sub>3</sub>   | 232.1                  | 173                  | 22                  | 16                       | ESI-               |
| NPX                  | 229.1                  | 170                  | 22                  | 16                       | ESI-               |
| NP                   | 345.17                 | 91.93                | 22                  | 16                       | ESI-               |
| 1-NT                 | 143.03                 | 115                  | 46                  | 22                       | ESI-               |

<sup>↑</sup>Compounds marked with a five-pointed star are TPs.

**Table S3.** Recoveries of all target compounds added to tap water with concentrations of 10 ng L<sup>-1</sup>, 100 ng L<sup>-1</sup> respectively. Data are shown as mean ± standard deviation.

| Compound             | Recovery (%) |             | LOD <sup>a</sup> | LOQ <sup>b</sup> |
|----------------------|--------------|-------------|------------------|------------------|
|                      | 10 ng        | 100 ng      |                  |                  |
| ACE <sup>↑</sup>     | 90.42±5.5    | 97.12±11.2  | 0.24             | 0.81             |
| PHE                  | 103.83±2.4   | 115.79±10.4 | 0.04             | 0.12             |
| ATP                  | 105.35±4.1   | 102.72±2.0  | 0.02             | 0.08             |
| BZB                  | 95.42±1.8    | 97.23±5.9   | 0.01             | 0.04             |
| 4-CBA <sup>↑</sup>   | 96.60±1.9    | 98.26±4.5   | 0.09             | 0.30             |
| CA                   | 98.85±3.9    | 104.06±5.5  | 0.04             | 0.13             |
| CBZ                  | 125.62±4.5   | 125.43±3.1  | 0.01             | 0.05             |
| CBZE <sup>↑</sup>    | 97.78±10.9   | 97.78±3.4   | 0.01             | 0.02             |
| DCF                  | 101.08±6.8   | 111.11±2.1  | 0.02             | 0.08             |
| 4-OHDCF <sup>↑</sup> | 98.8±3.9     | 135.36±4.3  | 0.01             | 0.01             |
| IPF                  | 99.86±4.7    | 99.92±0.6   | 0.31             | 1.03             |
| 2-OHIPF <sup>↑</sup> | 83.62±2.2    | 97.32±8.9   | 0.06             | 0.19             |
| CIPF <sup>↑</sup>    | 91.07±1.9    | 92.85±13.6  | 0.33             | 1.08             |
| NP                   | 62.43±0.3    | 62.43±3.6   | 0.01             | 0.01             |
| NPX                  | 91.72±3.9    | 91.08±7.2   | 0.08             | 0.23             |
| 1-NT                 | 65.45±8.0    | 64.0±9.3    | 0.03             | 0.09             |
| SDZ                  | 81.72±1.9    | 72.77±5.2   | 0.01             | 0.01             |
| STM <sup>↑</sup>     | 68.6±5.3     | 92.13±0.9   | 0.01             | 0.03             |
| ST                   | 98.99±3.9    | 71.83±3.3   | 0.01             | 0.01             |
| SMZ                  | 90.14±4.8    | 97.44±6.5   | 0.01             | 0.01             |
| NAST <sup>↑</sup>    | 103.61±11.6  | 107.56±7.3  | 0.02             | 0.06             |

<sup>a</sup>LOD refer to limits of detection (ng L<sup>-1</sup>) that were determined as lowest concentration corresponding to the signal-to-noise (S/N) ratio of 3.

<sup>b</sup>LOQ refer to limits of quantification (ng L<sup>-1</sup>) that were determined as lowest concentration corresponding to the signal-to-noise (S/N) ratio of 10.

<sup>↑</sup>Compounds marked with a five-pointed star are TPs.

**Table S4.** Concentrations (ng L<sup>-1</sup>) of all detected compounds at all sampling sites in rivers. Data are shown as mean ± standard deviation.

| STP<br>River         | The north city (NC) |                |                |                |                | The science park (SP) |                |                |                |                | The east city (EC) |                |                |                |
|----------------------|---------------------|----------------|----------------|----------------|----------------|-----------------------|----------------|----------------|----------------|----------------|--------------------|----------------|----------------|----------------|
|                      | Jinchuan (JC)       |                | Yangtze (YZ)   |                |                | Qinhuai (QH)          |                |                |                |                | Yunliang (YL)      |                |                |                |
| Compound             | N <sub>1</sub>      | N <sub>2</sub> | N <sub>3</sub> | N <sub>4</sub> | N <sub>5</sub> | S <sub>1</sub>        | S <sub>2</sub> | S <sub>3</sub> | S <sub>4</sub> | S <sub>5</sub> | E <sub>1</sub>     | E <sub>2</sub> | E <sub>3</sub> | E <sub>4</sub> |
| ACE <sup>↑</sup>     | 1490±75             | 107±24         | 430±11         | 66.4±33        | 18.3±0.25      | 82±4.3                | 124±14         | 94±1.0         | 96±2.8         | 84±14.8        | 586±92             | 187±23         | 180±42         | 131±33         |
| PHE                  | 93.3±4.4            | 78.6±6.4       | 65±13.9        | 7.9±2.7        | 3.5±0.49       | 6.5±1.0               | 20.8±1.8       | 7.8±1.7        | 7.9±0.32       | 7.1±0.17       | 11.5±1.1           | 244±11         | 296±26         | 291±12         |
| ATP                  | 9.5±2.6             | 8.2±2.0        | 9.4±2.5        | 15.4±2.5       | 17.8±4.0       | 1.2±0.17              | 2.9±0.42       | 1.9±0.57       | 1.6±0.15       | 1.3±0.15       | 2.5±0.71           | 1.5±0.38       | 1.9±0.042      | 1.7±0.49       |
| BZB                  | 9.2±0.75            | 9.5±0.47       | 9.4±1.3        | 5.0±0.48       | 4.2±0.41       | 3.1±1.1               | 11.9±2.7       | 5.6±1.6        | 2.9±0.19       | 3.0±0.46       | 1.6±0.25           | 2.5±0.49       | 2.47±0.59      | 2.2±0.62       |
| 4-CBA <sup>↑</sup>   | 13.9±2.8            | 7.8±0.51       | 17.9±2.3       | 21.5±1.3       | 25.2±1.1       | 9.9±1.8               | 12.3±2.4       | 8.2±1.5        | 7.35±0.71      | 11.3±3.5       | 23.4±5.6           | 10.7±1.95      | 13.6±1.5       | 15±2.8         |
| CA                   | 1.1±0.39            | 0.68±0.046     | 1.1±0.05       | 0.42±0.16      | 0.36±0.1       | ND                    | ND             | ND             | ND             | ND             | 0.8±0.26           | 1.35±0.78      | 1.13±0.5       | 1±0.29         |
| CBZ                  | 10.8±1.1            | 13.9±1.3       | 13.3±2.68      | 5.6±0.97       | 5.0±0.21       | 1.0±0.25              | 5.3±0.91       | 1.5±0.2        | 1.2±0.05       | 1.2±0.17       | 2.6±0.33           | 5.1±1.1        | 5.47±0.5       | 5.17±0.5       |
| CBZE <sup>↑</sup>    | 363±30              | 544±35         | 448±34         | 63.2±9.2       | 55.5±5.4       | 1.2±0.14              | 8.4±1.1        | 3.6±1.4        | 1.9±0.42       | 1.5±0.28       | 5.3±1.2            | 5.4±0.59       | 5.36±0.6       | 5.3±0.53       |
| DCF                  | 183±16              | 374±27         | 287±20         | 38.7±5.4       | 38.8±5.7       | ND                    | 22.3±7.2       | ND             | ND             | ND             | 19±3.9             | 22.6±8.6       | 26.7±2.1       | 25.1±1.8       |
| 4-OHDCF <sup>↑</sup> | 4.2±0.88            | 10.3±1.2       | 7.3±0.74       | 1.1±0.49       | 0.55±0.21      | ND                    | 1.4±0.14       | 0.3±0.11       | 0.26±0.05      | 0.11±0.0       | 0.53±0.4           | 2.3±0.62       | 2.2±0.87       | 1.87±0.59      |
| IPF                  | 162±17              | 94.0±16        | 114±21         | 19.7±6.4       | 8.5±3.5        | 15±2.6                | 17.6±5.9       | 15.8±4.6       | 17.1±4.5       | 18.7±2.1       | 203±10             | 94±16          | 104±7.1        | 96±10          |
| 2-OHIPF <sup>↑</sup> | 155±5.0             | 300±21         | 272±17         | 49.2±12.3      | 7.9±3.0        | 10.1±1.0              | 88.7±12        | 44.7±21        | 13.7±3.7       | 8.9±0.16       | 202±11             | 198±23         | 140±9.1        | 167±29         |
| CIPF <sup>↑</sup>    | ND                  | ND             | ND             | ND             | ND             | ND                    | ND             | ND             | ND             | ND             | ND                 | ND             | ND             | ND             |
| SDZ                  | 3.8±0.5             | 4.9±0.92       | 2.5±0.32       | 2.3±0.57       | 2.7±0.11       | 3.4±1.7               | 18.9±3.7       | 9.5±1.6        | 3.75±0.81      | 2.8±0.54       | 1.1±0.64           | 0.43±0.32      | 1.0±0.7        | 1.07±0.6       |
| STM <sup>↑</sup>     | ND                  | ND             | ND             | ND             | ND             | ND                    | ND             | ND             | ND             | ND             | ND                 | ND             | ND             | ND             |
| SMZ                  | 320±28              | 252±41         | 256±21         | 46±12          | 45±9.0         | 29±6.1                | 63.7±13        | 32.5±2.3       | 29.5±2.3       | 28.6±9.5       | 22.9±1.7           | 12.1±5.2       | 17.9±4.1       | 18.4±5.1       |
| NAST <sup>↑</sup>    | 356±30              | 285±34         | 270±21         | 48±11          | 35±10          | 30.8±8.3              | 54.8±13.5      | 40.2±12        | 35.6±5.04      | 34.4±5.6       | 95±8.1             | 76±12          | 73.5±3.7       | 70±3.6         |
| ST                   | 2.8±1.1             | 1.8±0.334      | 1.6±0.8        | 0.51±0.11      | 0.5±0.2        | ND                    | ND             | ND             | ND             | ND             | ND                 | ND             | ND             | ND             |
| 1-NT                 | 8.4±1.7             | ND             | ND             | ND             | ND             | 1.8±0.4               | ND             | ND             | 3.5±1.5        | 3.4±0.3        | 2.3±0.5            | 12.6           | 7.8            | 7.5            |
| NPX                  | 6.7±0.35            | 10±1.2         | 9.9±0.61       | ND             | ND             | ND                    | 7.4±1.6        | ND             | ND             | ND             | 1.8±0.35           | 1.75±0.3       | 2.2±0.8        | 1.75±0.4       |
| NP                   | ND                  | 11.9±4.5       | ND             | ND             | ND             | ND                    | ND             | ND             | ND             | ND             | ND                 | ND             | ND             | ND             |

ND indicates no detectable or below LOQ.

<sup>↑</sup>Compounds marked with a five-pointed star are TPs.

**Table S5.** Details data of relevant analysis between the physical-chemical properties of compounds and attenuation rates by use of SPSS software.

|        |                     | LogKow | YZ     | QH     | YL     |
|--------|---------------------|--------|--------|--------|--------|
| LogKow | Pearson Correlation | 1      | 0.459  | -0.202 | -0.130 |
|        | Sig. (2-tailed)     |        | 0.074  | 0.509  | 0.633  |
|        | N                   | 17     | 16     | 13     | 16     |
| YZ     | Pearson Correlation | 0.459  | 1      | 0.179  | 0.616* |
|        | Sig. (2-tailed)     | 0.074  |        | 0.578  | 0.014  |
|        | N                   | 16     | 16     | 12     | 15     |
| QH     | Pearson Correlation | -0.202 | 0.179  | 1      | 0.078  |
|        | Sig. (2-tailed)     | 0.509  | 0.578  |        | 0.801  |
|        | N                   | 13     | 12     | 13     | 13     |
| YL     | Pearson Correlation | -0.130 | 0.616* | 0.078  | 1      |
|        | Sig. (2-tailed)     | 0.633  | 0.014  | 0.801  |        |
|        | N                   | 16     | 15     | 13     | 16     |

\*Correlation is significant at the 0.05 level (2-tailed).

**Table S6.** Attenuation values (%) from 11 pharmaceuticals and their TPs which were detected from samples collected by active and passive sampling. Data are shown as mean  $\pm$  standard deviation.

| River                | Qinhuai (QH)     |                 | Yunliang (YL)    |                  |
|----------------------|------------------|-----------------|------------------|------------------|
| Compound             | Active           | Passive         | Active           | Passive          |
| ACE <sup>↑</sup>     | 3.4 $\pm$ 4.3    | 7.8 $\pm$ 11.6  | 47.6 $\pm$ 24.2  | 89.1 $\pm$ 4.9   |
| PHE                  | 22.8 $\pm$ 16.2  | 25.8 $\pm$ 3.2  | 18.6 $\pm$ 3.1   | 19.5 $\pm$ 22.1  |
| BZB                  | 45.5 $\pm$ 25.6  | N.A.            | -82.3 $\pm$ 23.4 | -65.1 $\pm$ 30.9 |
| 4-CBA <sup>↑</sup>   | -91.2 $\pm$ 28.9 | N.A.            | -73.4 $\pm$ 2.7  | 30.5 $\pm$ 11    |
| CBZE <sup>↑</sup>    | 23.2 $\pm$ 18.1  | 14.6 $\pm$ 7.3  | 3.6 $\pm$ 14.5   | 8.1 $\pm$ 6.5    |
| 4OH-DCF <sup>↑</sup> | 50.5 $\pm$ 4.2   | N.A.            | 19.8 $\pm$ 11.9  | 22.5 $\pm$ 7.3   |
| IPF                  | -55 $\pm$ 22.4   | -39.3 $\pm$ 2.8 | -14.2 $\pm$ 10.2 | -6.2 $\pm$ 6.6   |
| 2OH-IPF <sup>↑</sup> | 53.4 $\pm$ 13.7  | N.A.            | 23.4 $\pm$ 18.7  | 15.6 $\pm$ 21.9  |
| SDZ                  | 59.6 $\pm$ 7.5   | 48.3 $\pm$ 12.1 | -127 $\pm$ 5.9   | -82.3 $\pm$ 8.5  |
| SMZ                  | 12.2 $\pm$ 11.2  | 11.3 $\pm$ 1.6  | 41.9 $\pm$ 17.6  | 34 $\pm$ 14.8    |
| NAST <sup>↑</sup>    | 27.9 $\pm$ 6.7   | 23.4 $\pm$ 19.5 | 2.1 $\pm$ 9.6    | 5.1 $\pm$ 14.4   |

N.A indicates attenuation values cannot be obtained due to no detectable or concentration below LOQ.

<sup>↑</sup>Compounds marked with a five-pointed star are TPs.



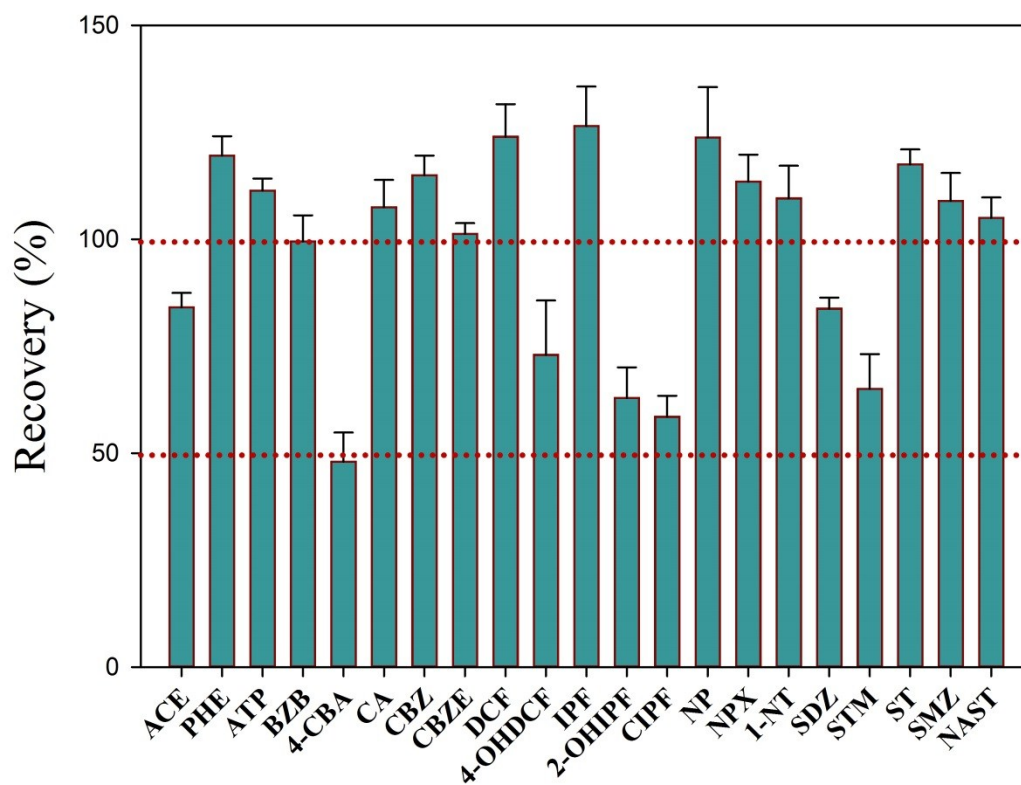

**Figure S1.** Recoveries of all target compounds spiked to river water with concentrations of 100 ng L<sup>-1</sup>. Error bars represent the standard deviation.
